# Supplementary material for: Wavelike zinc coordination polymers: anion-modulated ligand conformation and fluorescence detection of 4-aminobenzylamine
Source: Royal Society of Chemistry journal article supplement (doi:10.1039/d3ce01228j), 2024-01-01
Supplement: d3ce01228j1.pdf [file d3ce01228j1.pdf]

## Supporting Information

### **Wavelike zinc coordination polymers: anion-modulated ligand conformation and fluorescence detection of 4-aminobenzylamine**

**Pei-Chin Lee, Tzu-Chiao Huang and Jing-Yun Wu\***

Department of Applied Chemistry, National Chi Nan University, Nantou 545, Taiwan. E-mail:  
jyunwu@ncnu.edu.tw

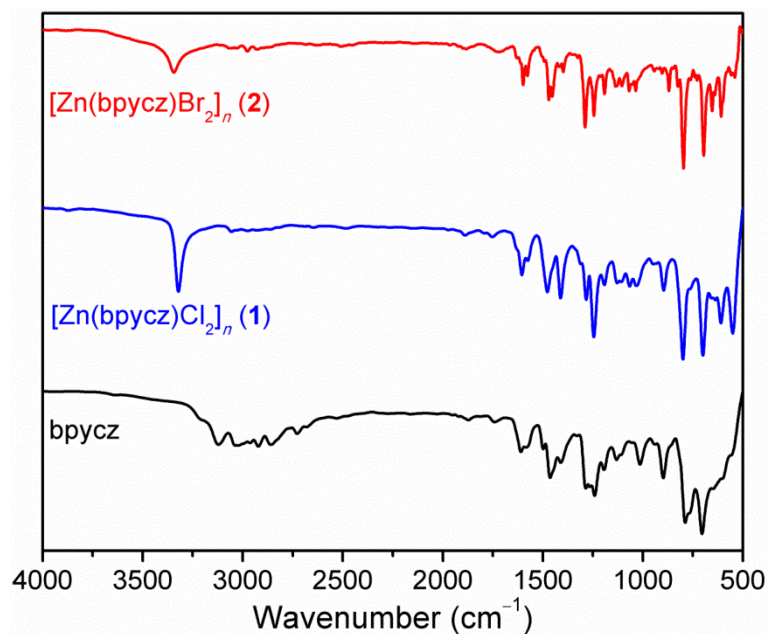

**Fig. S1** IR spectra of bpycz and compounds **1** and **2**.

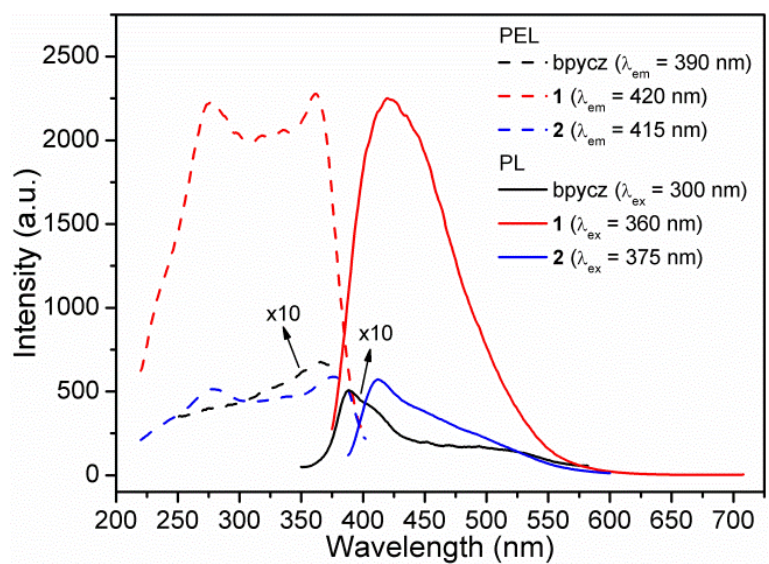

**Fig. S2** Solid-state excitation (dashed lines) and emission spectra (solid lines) of bpycz, **1**, and **2**.

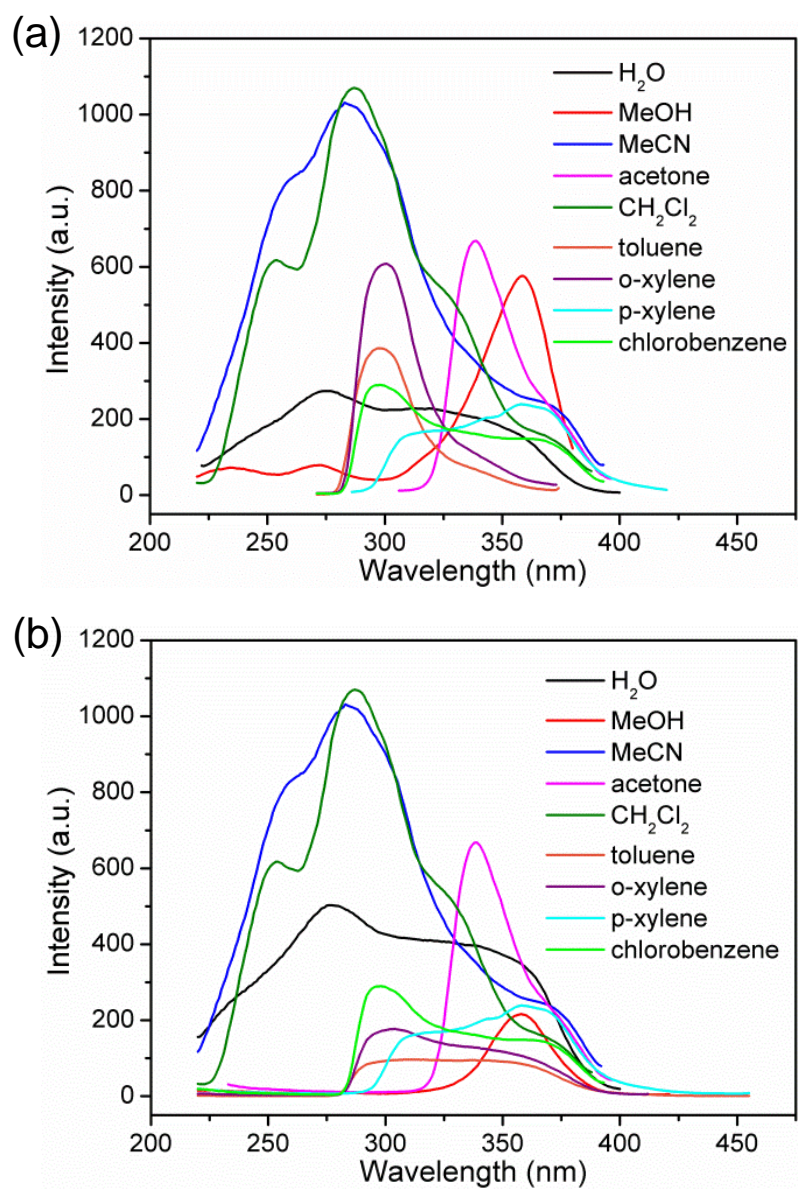

**Fig. S3** Excitation spectra of (a) **1** and (b) **2** dispersing in various solvents as suspensions.

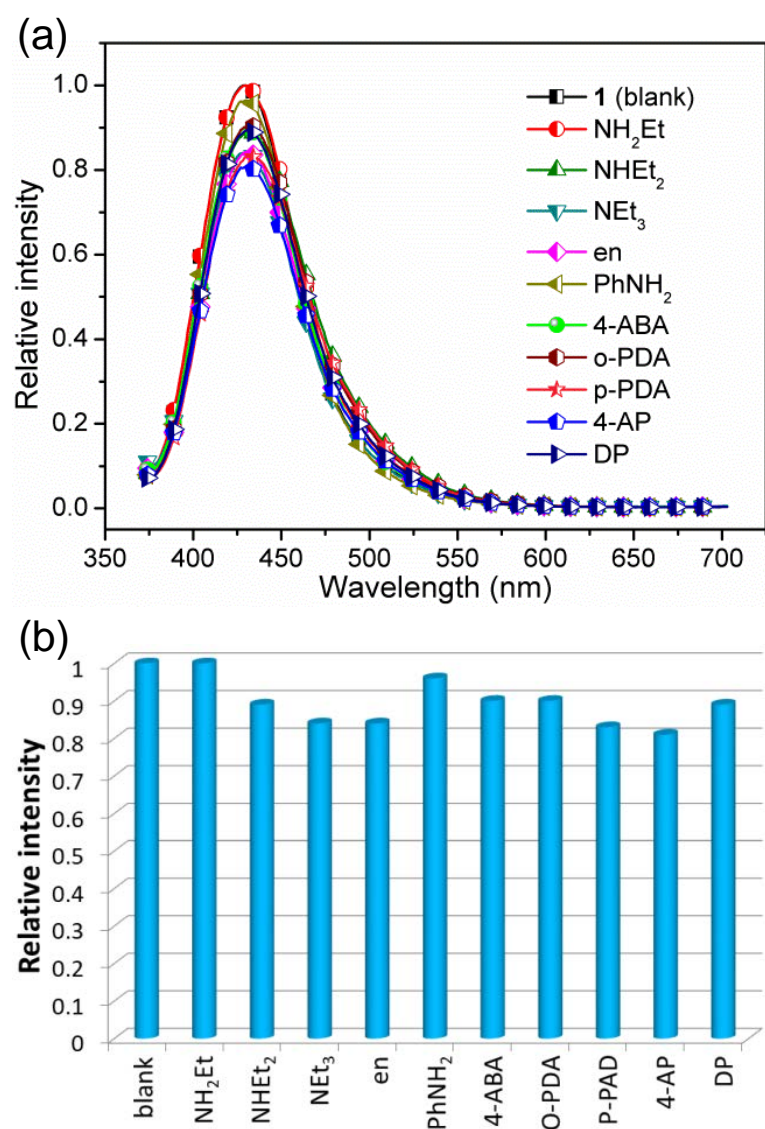

**Fig. S4** (a) Fluorescence spectra and (b) relative intensity bar chart of **1** in H<sub>2</sub>O suspension before and after addition of 1.0 mM amine analytes upon excitation at 330 nm.

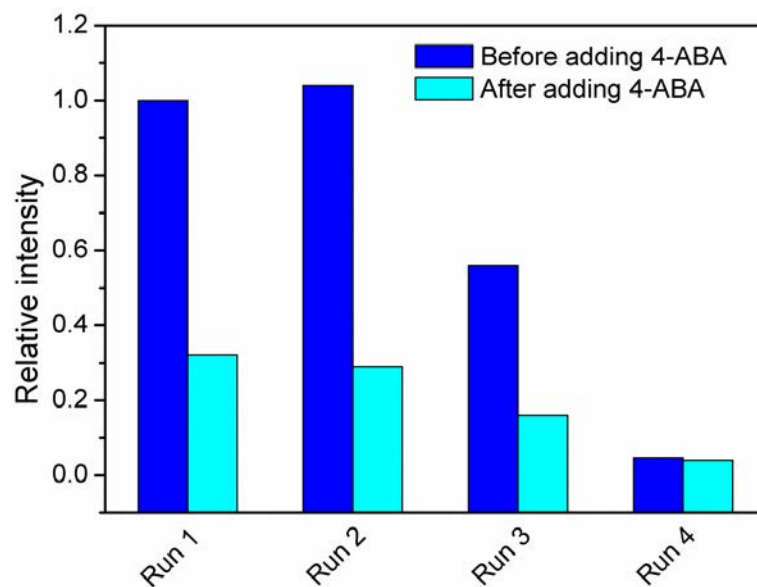

**Fig. S5** Relative intensity bar chart of **2** in H<sub>2</sub>O suspension before and after addition of 1.0 mM 4-ABA in four sensing–regeneration cycles upon excitation at 330 nm.

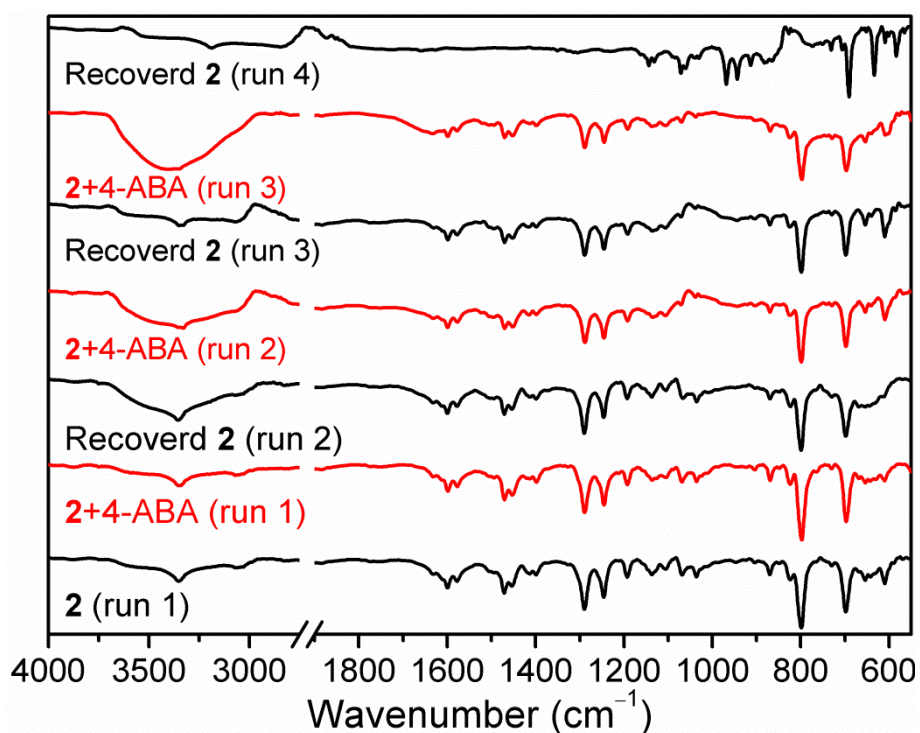

**Fig. S6** IR spectra of **2** before and treated with 4-ABA in four sensing–regeneration cycles.

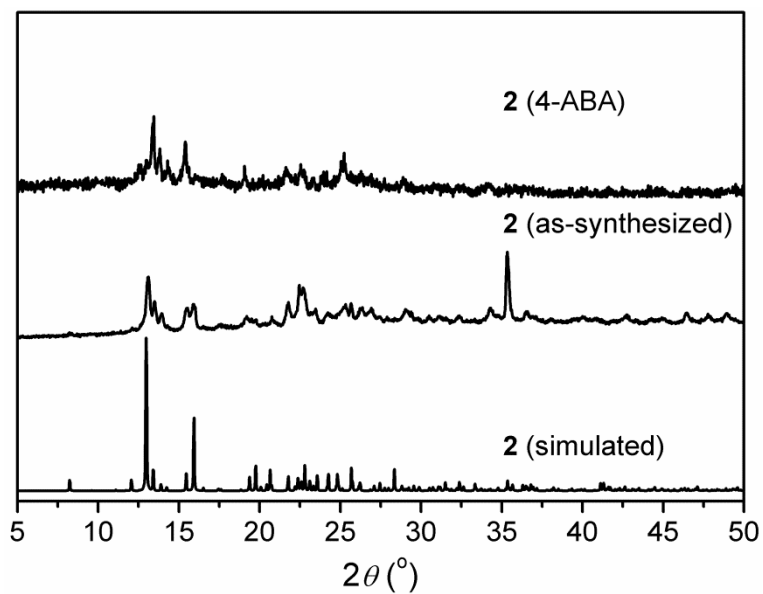

**Fig. S7** XRPD patterns of **2**: simulated, as-synthesized, and after treated with 4-ABA for 24 h.

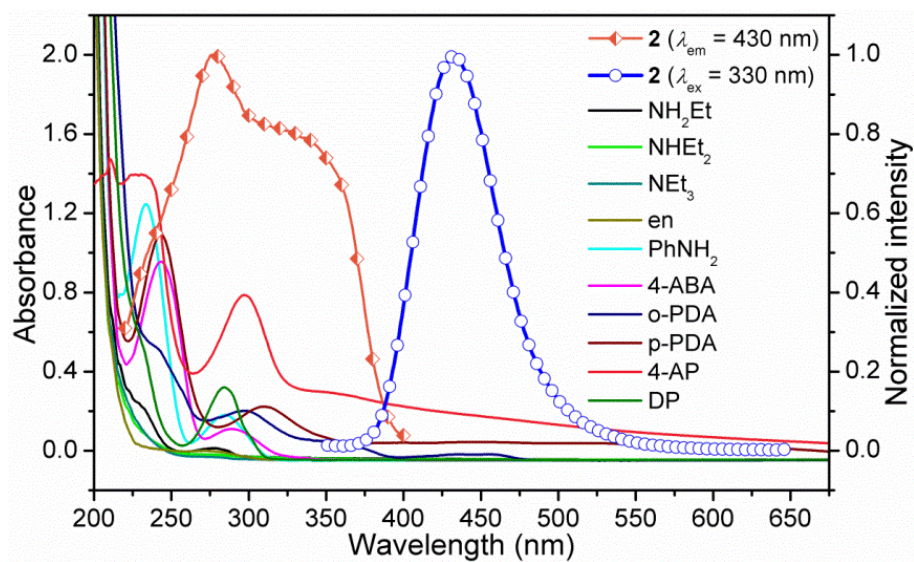

**Fig. S8** Overlapped UV/visible absorption spectra of amine analytes in water and the excitation and emission spectra of **2** in  $H_2O$  suspension.

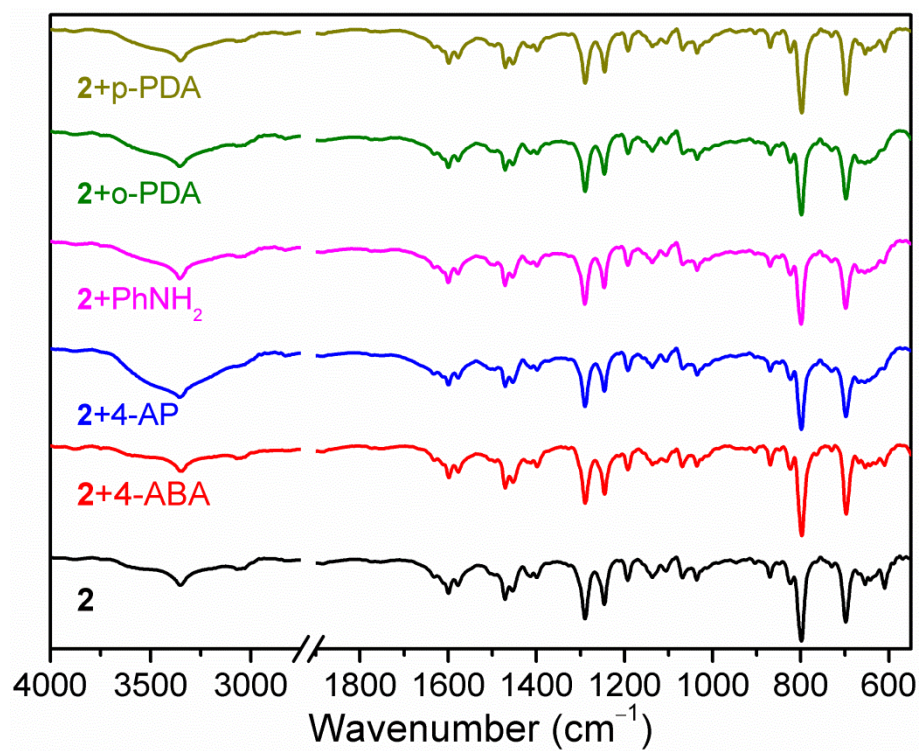

**Fig. S9** IR spectra of **2** before and treated with 4-ABA, 4-AP, PhNH<sub>2</sub>, o-PDA, and p-PDA.

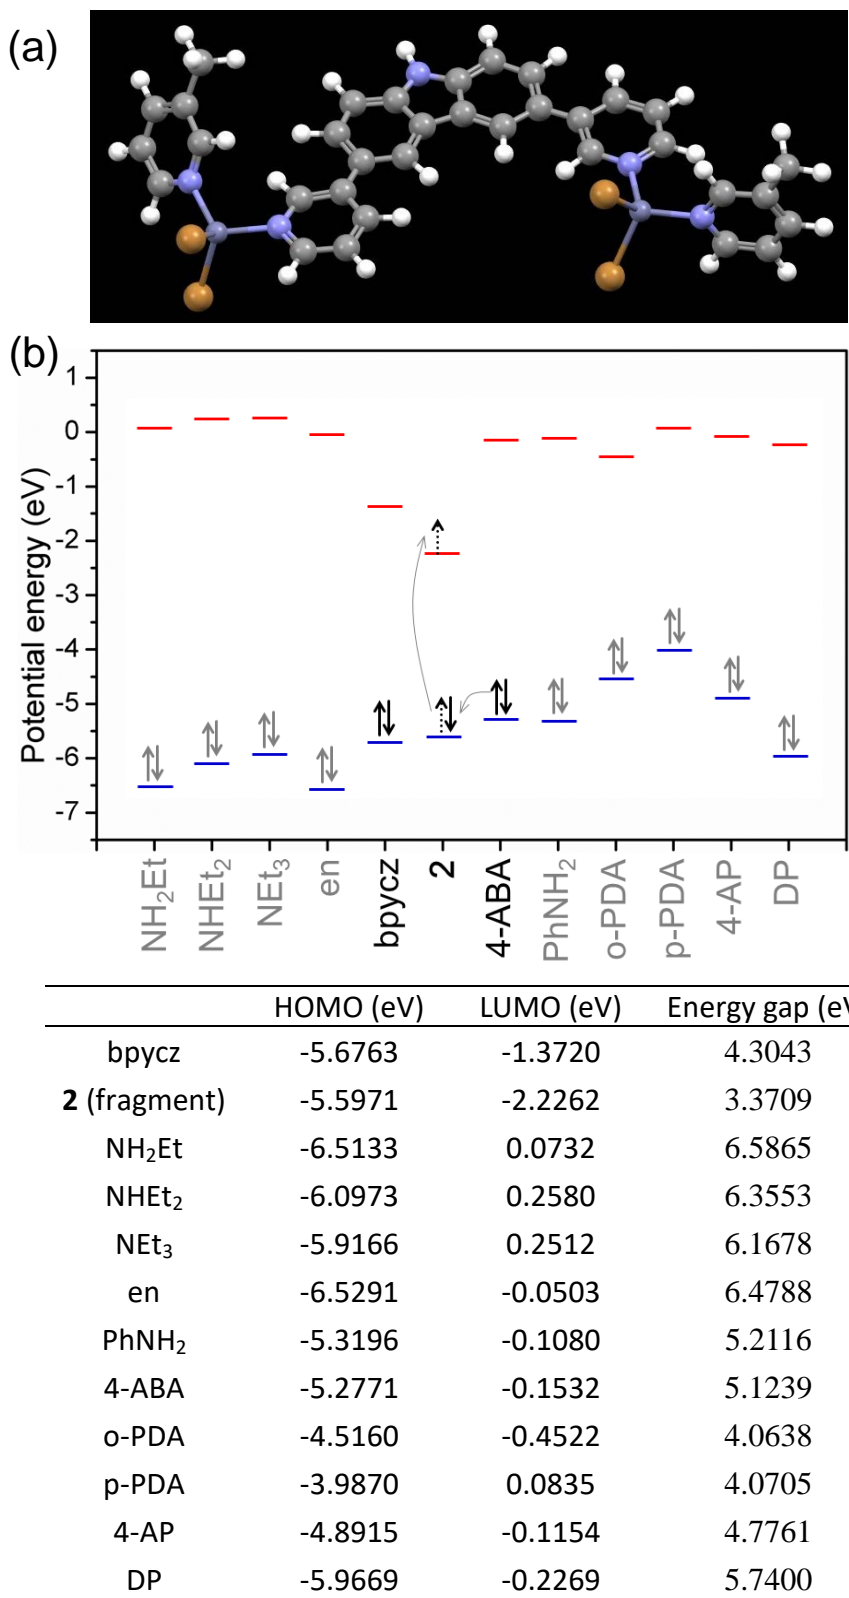

**Fig. S10** (a) The modified partial framework  $\{Zn_2Br_4(bpycz)_3(3-Mepy)_2\}$  used for calculation of the HOMO–LUMO energy levels of **2**. (b) The HOMO–LUMO energy levels of amines, bpycz, and modified partial framework of **2** via the density functional theory at B3LYP/6-31G\* level, using Gaussian 09 package of programs.
